# Supplementary material for: Subchronic toxicity of magnesium oxide nanoparticles to Bombyx mori silkworm
Source: Royal Society of Chemistry journal article supplement (doi:10.1039/d2ra01161a), 2022-01-01
Supplement: d2ra01161a1.pdf [file d2ra01161a1.pdf]

# Supplementary Information

for

## Subchronic toxicity of magnesium oxide nanoparticles to *Bombyx mori* silkworm

Lin Ma<sup>\*#a</sup>, Vivian Andoh<sup>#a,b</sup>, Zhongyuan Shen<sup>a</sup>, Haiyan Liu<sup>c</sup>, Long Li<sup>a</sup>, Keping  
Chen<sup>\*b</sup>

<sup>a</sup>College of Biotechnology, Jiangsu University of Science and Technology, Zhenjiang  
Jiangsu, 212001, P. R. China

<sup>b</sup>Institute of Life Science, Jiangsu University, Zhenjiang Jiangsu, 212013, P. R. China

<sup>c</sup>Tea and Food Science and Technology Institute, Jiangsu Vocational College of  
Agriculture and Forestry, Jurong 212400, China

Email: Lin Ma\*-ma\_lin\_1988@126.com; Keping Chen-kpchen@ujs.edu.cn

\*Corresponding author.

# These authors contributed equally to this work.

### 1. Experimental section

#### 1.1. The characterization of the MgO NPs

Ultraviolet-visible (UV-vis) absorption spectrometry (Ultrospec7000, Biochrom, UK)  
was used to obtain the absorbance spectrum of the MgO NPs. A MIRA3 SEM  
(scanning electron microscope, Tescan, Czech Republic) was used to study the size  
and shape of the MgO NPs. High-resolution transmission electron microscope (TEM)

23 was further used to characterize the size, shape and lattice fringe of the MgO NPs,  
24 using a FEI Talos F200X electron microscope (FEI, America) with a 200 kV  
25 acceleration voltage. TEM-EDS (Energy dispersive X-ray spectroscopy) point  
26 analysis was also used for element identification in the NP.

### 27 **1.2. Tensile test**

28 The mechanical parameters of the degummed silks were collected by the college of  
29 textile and clothing engineering of Soochow University, *via* an Instron 3365 universal  
30 testing machine (Instron, America), the gauge length was 500 mm, extension rate was  
31 500 mm min<sup>-1</sup>, 20 specimens were measured per group, the whole experiment was  
32 carried out in a constant temperature and humidity lab (20 °C, 65% RH).

### 33 **1.3. Silkworm rearing**

34 Silkworms (*Bombyx mori*, jingsong × haoyue) were hatched in a climatic chamber  
35 under 25 °C and 70-80% RH, newly hatched silkworm larvae were fed with finely  
36 chopped fresh mulberry leaves until the 3<sup>rd</sup> instar, under 27 °C and 80-90% RH. 4<sup>th</sup>  
37 and 5<sup>th</sup> instar silkworm larvae were transferred into bamboo trays and fed directly  
38 with fresh mulberry leaves, under 26 °C and 70-75% RH.

### 39 **1.4. Silk reeling**

40 Cocoons were reeled to remove the sericin coated on the surface of silk fibroin,  
41 through a XJ401 automatic cocoon reeling apparatus (Hangzhou Feiyu technological  
42 engineering Co., Ltd., China). In brief, cocoons were dried in a drying oven for 4 h at  
43 80 °C, which was softened in boiling water for a few minutes and transferred into hot  
44 water (70 °C). The treated cocoons were finally reeled by an automatic cocoon reeling

45 apparatus, then shade dried. The cocoons were reeled by using 5 together at a time,  
46 which means that the finally obtained degummed silk fiber is a bunch of 5 single silk  
47 fibers.

## 48 **2. Results and Discussion**

### 49 **2.1. The characterization of the MgO NPs**

50 UV-vis absorption spectrometry was employed to characterize the optical response of  
51 the MgO NPs, the result displayed in **Fig. S1** shows that the maximum absorption  
52 peak is located around 260 nm, corresponding to the dipole resonance of MgO NPs,  
53 usually ranged between 260 to 280 nm [1, 2]. SEM (scanning electron microscope)  
54 and high-resolution TEM (transmission electron microscope) were used to study the  
55 geometrical and morphological characteristics of the MgO NPs, and the results can be  
56 seen in **Fig. S2a-c**. The SEM result in **Fig. S2a** shows that the MgO NPs are three-  
57 dimensional nanomaterials with regular structure. The TEM results in **Fig. S2b, c**  
58 show that the shape of MgO NPs is random while some are hexagonal. Calculated by  
59 Nano-measure software (Version 1.2), it is estimated that the size of MgO NPs is  
60 ranged from 11 to 49 nm, with an approximate average size of 23 nm (the insert in  
61 **Fig. 2Sb**). The lattice fringe of the MgO NP with 0.21nm distance, which is assigned  
62 to the (200) plane, is clearly seen in **Fig. S2c**, proving its good crystallization. TEM-  
63 EDS (Energy dispersive X-ray spectroscopy) point analysis was used to characterize  
64 the element composition in the MgO NPs (**Fig. 2Sd**). The result shows that Mg and O  
65 are the main contents in the NP, with an atomic fraction of 40.07% (Mg) and 59.93%  
66 (O), respectively. Overall, the results prove that the NPs used in this assay is MgO

67 NPs, with an average size around 20 nm.

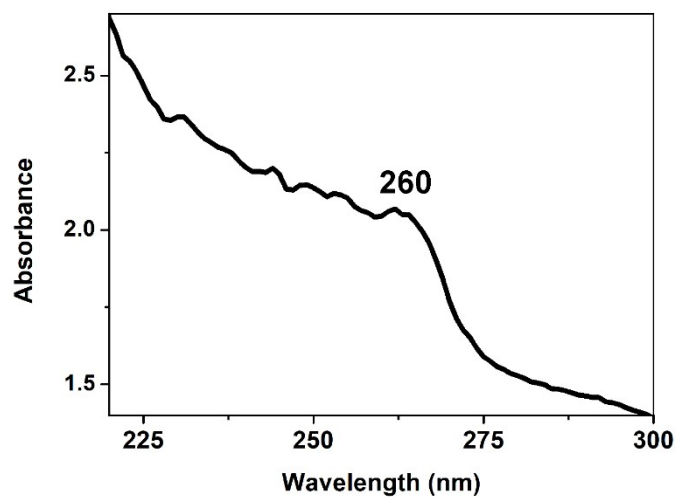

68

69

**Fig. S1** UV-vis absorbance spectrum of MgO NPs.

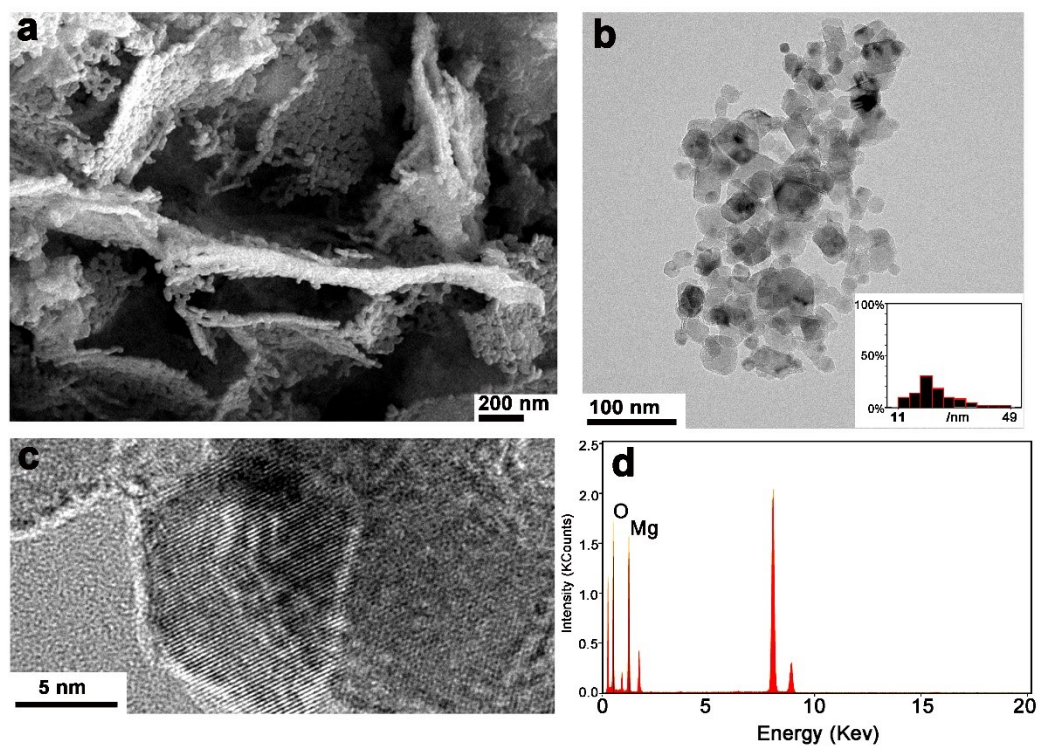

70

71 **Fig. S2** SEM (a), TEM(b) and high resolution-TEM(c) images of MgO NPs. (d) EDS

72 spectra for MgO NPs.

73 **2.2. The comparison of the average cocoon weight and silk diameter from**

74 **different groups**

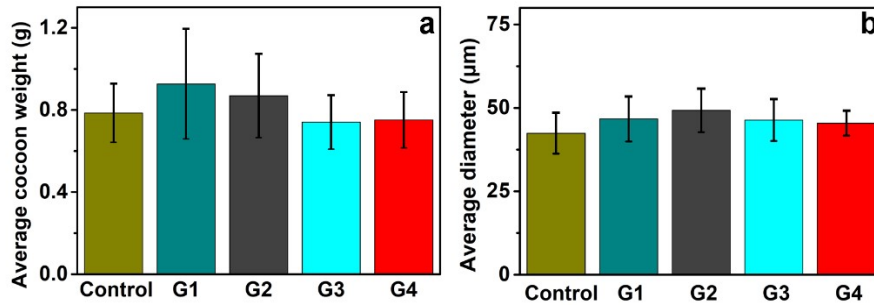

75

76 **Fig. S3** The comparison of the average cocoon weight (ACW) and average silk  
 77 diameter (ASD) from different groups. The data of ACW are calculated based on 20  
 78 samples, the one of ASD are calculated by the measurement of 10 single silk fibers.  
 79 The error bars represent the standard deviation of the cocoon weight (a) and silk  
 80 diameter (b), respectively.

81 **2.3. Mechanical properties of different silks**

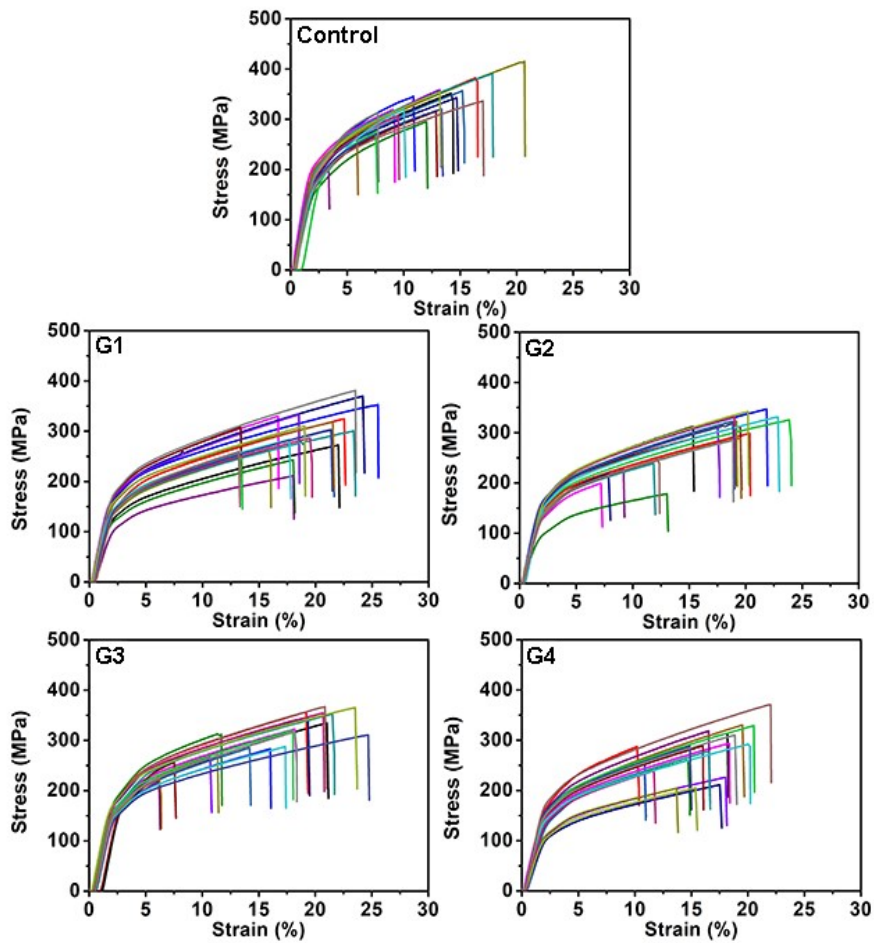

82

83 **Fig. S4** Strain-Stress curves of different silk samples

84 **Table S1.** Mechanical properties of silks

| <b>Sample</b> | <b>Elongation at break (%)</b> | <b>Breaking strength (MPa)</b> | <b>Toughness modulus (MPa)</b> |
|---------------|--------------------------------|--------------------------------|--------------------------------|
| Control       | 12.23                          | 329.01                         | 30.74                          |
| G1            | 19.43                          | 300.15                         | 44.03                          |
| G2            | 16.87                          | 285.93                         | 37.88                          |
| G3            | 16.32                          | 307.67                         | 38.91                          |
| G4            | 16.22                          | 276.95                         | 33.82                          |

85 **2.4. Global gene expression changes with RNA-SEQ**

86 **2.4.1. The expression changes of genes related to metabolism,**  
87 **immune and xenobiotics biodegradation**

88 **Table S2.** The expression changes of genes related to metabolism

| <b>ID</b>      | <b>Fold change (G1/control)</b> | <b>P Value</b>         | <b>FDR</b>            | <b>Description</b>                              |
|----------------|---------------------------------|------------------------|-----------------------|-------------------------------------------------|
| ncbi_101744519 | 3.70                            | $1.97 \times 10^{-10}$ | $5.09 \times 10^{-8}$ | neutral ceramidase                              |
| ncbi_101742351 | 6.14                            | $9.57 \times 10^{-5}$  | 0.00298               | heparan-alpha-glucosaminide N-acetyltransferase |
| ncbi_101737000 | 3.33                            | $6.86 \times 10^{-8}$  | $9.53 \times 10^{-6}$ | pancreatic triacylglycerol lipase-like          |

|                |      |                       |                       |                                                                                |
|----------------|------|-----------------------|-----------------------|--------------------------------------------------------------------------------|
| ncbi_101744377 | 100  | $5.87 \times 10^{-6}$ | 0.000363              | neutral ceramidase                                                             |
| ncbi_101738716 | 2.49 | $3.29 \times 10^{-7}$ | $3.68 \times 10^{-5}$ | putative fatty acyl-CoA reductase<br>CG5065                                    |
| ncbi_101743171 | 160  | $6.31 \times 10^{-5}$ | 0.00215               | acyl-CoA Delta (11) desaturase-like                                            |
| ncbi_101739150 | 3.30 | 0.000280              | 0.00646               | lipase member I-like                                                           |
| ncbi_101736399 | 2.19 | 0.00117               | 0.0183                | solute carrier family 22 member 5                                              |
| ncbi_101745064 | 2.89 | 0.00159               | 0.0221                | putative phosphatidate phosphatase                                             |
| MSTRG.18733    | 623  | $5.87 \times 10^{-6}$ | 0.000363              | cytochrome P450, partial [ <i>Bombyx mori</i> ]<br>dehydrogenase/reductase SDR |
| ncbi_101745761 | 2.24 | 0.000390              | 0.00834               | family member 4                                                                |
| ncbi_101746769 | 2.19 | 0.000214              | 0.00526               | N-acetylglucosaminyl-<br>phosphatidylinositol de-N-acetylase                   |
| ncbi_101744960 | 2.28 | $7.66 \times 10^{-7}$ | $7.33 \times 10^{-5}$ | alanine--glyoxylate<br>aminotransferase 2, mitochondrial                       |
| ncbi_101744138 | 4.55 | 0.00222               | 0.0278                | probable alpha-glucosidase<br>Os06g0675700                                     |
| ncbi_101741195 | 3.85 | $1.24 \times 10^{-6}$ | 0.000112              | probable beta-hexosaminidase fdl                                               |
| ncbi_100101196 | 2.11 | 0.00278               | 0.0321                | beta-N-acetylglucosaminidase 2<br>precursor                                    |
| ncbi_110385268 | 3.21 | 0.00478               | 0.0469                | potassium voltage-gated channel<br>protein Shal-like                           |

|                |       |                       |          |                                                                 |
|----------------|-------|-----------------------|----------|-----------------------------------------------------------------|
| ncbi_732849    | 2.34  | 0.000587              | 0.0112   | fibroblast growth factor receptor<br>precursor                  |
|                |       |                       |          | LOW QUALITY PROTEIN:                                            |
| ncbi_101744393 | 7.93  | 0.000180              | 0.00470  | chitooligosaccharidolytic beta-N-<br>acetylglucosaminidase-like |
| ncbi_101739565 | 110   | 0.00138               | 0.0199   | aldose reductase<br>alanine--glyoxylate                         |
| ncbi_101744767 | 83.3  | 0.00259               | 0.0303   | aminotransferase 2, mitochondrial-<br>like                      |
| ncbi_101736038 | 23.3  | 0.00259               | 0.0303   | para-nitrobenzyl esterase                                       |
| ncbi_100329149 | 2.26  | $1.47 \times 10^{-6}$ | 0.000129 | aliphatic nitrilase                                             |
| ncbi_101736396 | 4.50  | 0.00106               | 0.0171   | alpha-amylase 4N                                                |
| ncbi_101743752 | 53.3  | 0.00259               | 0.0303   | elongation of very long chain fatty<br>acids protein 7          |
| ncbi_101735436 | 76.7  | 0.00490               | 0.0469   | glutamine synthetase 2 cytoplasmic                              |
| ncbi_101740654 | 53.3  | 0.000395              | 0.00834  | fatty acyl-CoA reductase wat                                    |
| ncbi_101742671 | 0.492 | 0.000196              | 0.00506  | probable allantoinase                                           |
| MSTRG.17018    | 0.313 | $3.41 \times 10^{-6}$ | 0.000249 | aminopeptidase N precursor<br>[ <i>Bombyx mori</i> ]            |
| ncbi_101745114 | 0.401 | $3.95 \times 10^{-5}$ | 0.00158  | decaprenyl-diphosphate synthase<br>subunit 2                    |
|                |       |                       |          | LOW QUALITY PROTEIN:                                            |
| ncbi_101736031 | 0.133 | $5.81 \times 10^{-5}$ | 0.00708  |                                                                 |



|                |        |                       |          |                                                    |
|----------------|--------|-----------------------|----------|----------------------------------------------------|
|                |        |                       |          | alpha-N-acetylgalactosaminidase                    |
| ncbi_101739517 | 0.183  | 0.000114              | 0.00337  | N-acetylneuraminate lyase                          |
| ncbi_101736026 | 0.365  | 0.000222              | 0.00538  | adenine phosphoribosyltransferase                  |
| ncbi_101735471 | 0.210  | 0.000130              | 0.00369  | methylenetetrahydrofolate<br>reductase             |
| ncbi_101742863 | 0.471  | 0.00236               | 0.0291   | fatty acyl-CoA reductase wat-like                  |
| ncbi_101743809 | 0.264  | 3.88×10 <sup>-6</sup> | 0.000277 | vanin-like protein 1                               |
| ncbi_100862823 | 0.0120 | 0.00138               | 0.0199   | UDP-glycosyltransferase<br>UGT47A1 precursor       |
| ncbi_692403    | 0.477  | 0.000441              | 0.00901  | chitinase-related protein 1 precursor              |
| ncbi_101743711 | 0.490  | 0.000305              | 0.00683  | lipase 1                                           |
| ncbi_101744242 | 0.333  | 1.69×10 <sup>-5</sup> | 0.000818 | probable peroxisomal acyl-<br>coenzyme A oxidase 1 |
| ncbi_105841519 | 0.342  | 0.00150               | 0.0211   | lipase 1-like                                      |
| ncbi_105842081 | 0.457  | 0.00338               | 0.0370   | adenylate cyclase type 3                           |
| ncbi_105841520 | 0.394  | 0.00513               | 0.0480   | lipase 1                                           |
| ncbi_692793    | 0.261  | 0.000421              | 0.00871  | arginase                                           |
| ncbi_101740270 | 0.0500 | 0.00490               | 0.0469   | uncharacterized protein<br>LOC101740270            |
| ncbi_101747146 | 0.0115 | 0.00490               | 0.0469   | uncharacterized protein<br>LOC101747146            |
| ncbi_101744260 | 0.125  | 0.00370               | 0.0400   | putative fatty acyl-CoA reductase                  |

| CG5065                            |        |                        |                       |                                                      |
|-----------------------------------|--------|------------------------|-----------------------|------------------------------------------------------|
| NADH dehydrogenase                |        |                        |                       |                                                      |
| ncbi_101738818                    | 0.324  | 0.00309                | 0.0346                | [ubiquinone] 1 alpha subcomplex<br>subunit 6-like    |
| ncbi_101743673                    | 0.388  | 0.000634               | 0.0119                | catalase                                             |
| ncbi_110384899                    | 0.0125 | 0.00490                | 0.0469                | dehydrogenase/reductase SDR<br>family member 13-like |
| ncbi_101745539                    | 0.465  | 0.00122                | 0.0189                | thiamin pyrophosphokinase 1                          |
| LOW QUALITY PROTEIN:              |        |                        |                       |                                                      |
| ncbi_110385499                    | 0.466  | $5.82 \times 10^{-6}$  | 0.000363              | uncharacterized protein<br>LOC110385499              |
| ncbi_101742639                    | 0.0300 | 0.00490                | 0.0469                | high-affinity choline transporter 1                  |
| ncbi_101742625                    | 0.333  | 0.00536                | 0.0494                | fatty acid synthase                                  |
| LOW QUALITY PROTEIN:              |        |                        |                       |                                                      |
| ncbi_101741329                    | 0.267  | $5.32 \times 10^{-10}$ | $1.22 \times 10^{-7}$ | catalase                                             |
| UDP-glycosyltransferase           |        |                        |                       |                                                      |
| ncbi_100862808                    | 0.493  | $2.57 \times 10^{-5}$  | 0.00113               | UGT33R1 precursor                                    |
| putative fatty acyl-CoA reductase |        |                        |                       |                                                      |
| ncbi_101739999                    | 0.475  | 0.00350                | 0.0379                | CG5065                                               |
| ncbi_100862782                    | 0.454  | $3.01 \times 10^{-6}$  | 0.000230              | c-myc                                                |
| ncbi_100141446                    | 0.216  | $3.84 \times 10^{-10}$ | $9.33 \times 10^{-8}$ | glutathione S-transferase epsilon 3                  |
| ncbi_100329150                    | 0.426  | $3.99 \times 10^{-7}$  | $4.40 \times 10^{-5}$ | carboxyl/cholinesterase 1 precursor                  |

|                |        |                        |                       |                                                              |
|----------------|--------|------------------------|-----------------------|--------------------------------------------------------------|
| ncbi_101739608 | 0.499  | $3.41 \times 10^{-5}$  | 0.00143               | 1-acyl-sn-glycerol-3-phosphate<br>acyltransferase alpha-like |
| ncbi_101735916 | 0.391  | $5.20 \times 10^{-7}$  | $5.48 \times 10^{-5}$ | fatty acyl-CoA reductase wat                                 |
| ncbi_101737703 | 0.392  | $6.38 \times 10^{-7}$  | $6.40 \times 10^{-5}$ | glycine cleavage system H protein,<br>mitochondrial          |
| ncbi_101738534 | 0.248  | $8.16 \times 10^{-10}$ | $1.84 \times 10^{-7}$ | acyl-CoA Delta(11) desaturase-like                           |
| ncbi_101738415 | 0.496  | $4.98 \times 10^{-5}$  | 0.00187               | dehydrodolichyl diphosphate<br>synthase complex subunit Nus1 |
| ncbi_101745831 | 0.486  | $2.78 \times 10^{-5}$  | 0.00121               | putative fatty acyl-CoA reductase<br>CG5065                  |
| ncbi_101737440 | 0.338  | $1.62 \times 10^{-10}$ | $4.34 \times 10^{-8}$ | esterase FE4-like                                            |
| ncbi_101738177 | 0.443  | $2.94 \times 10^{-5}$  | 0.00128               | triokinase/FMN cyclase<br>UDP-glycosyltransferase            |
| ncbi_100862842 | 0.448  | $3.38 \times 10^{-6}$  | 0.000248              | UGT33R2<br>precursor                                         |
| ncbi_101744378 | 0.426  | $2.80 \times 10^{-5}$  | 0.00122               | putative fatty acyl-CoA reductase<br>CG5065                  |
| ncbi_101736595 | 0.0115 | $1.05 \times 10^{-5}$  | 0.000579              | uncharacterized protein<br>LOC101736595                      |
| ncbi_101736222 | 0.473  | $8.00 \times 10^{-6}$  | 0.000468              | molybdopterin synthase catalytic<br>subunit                  |
| ncbi_101745478 | 0.485  | $1.30 \times 10^{-5}$  | 0.000685              | GTP 3',8-cyclase, mitochondrial                              |

|                |          |                        |                        |                                                    |
|----------------|----------|------------------------|------------------------|----------------------------------------------------|
| ncbi_101746910 | 0.484    | $1.13 \times 10^{-5}$  | 0.000611               | glucose dehydrogenase [FAD,<br>quinone]            |
| ncbi_100642185 | 0.194    | 0.000273               | 0.00635                | soluble guanylyl cyclase alpha-1<br>subunit        |
| ncbi_105842833 | 0.00155  | 0.000395               | 0.00834                | phosphopantothenate--cysteine<br>ligase-like       |
| MSTRG.7665     | 0.307    | 0.000368               | 0.00794                | mariner transposase [ <i>Bombyx mori</i> ]         |
| ncbi_105842680 | 0.0120   | 0.000116               | 0.00337                | uncharacterized protein<br>LOC105842680            |
| ncbi_101736644 | 0.188    | $9.18 \times 10^{-8}$  | $1.21 \times 10^{-5}$  | lysosomal alpha-mannosidase                        |
| ncbi_105842722 | 0.393    | 0.000167               | 0.00447                | GPI-anchored wall transfer protein<br>1-like       |
| ncbi_101737058 | 0.136    | $1.73 \times 10^{-6}$  | 0.000148               | carbohydrate sulfotransferase 11                   |
| ncbi_101735627 | 0.000952 | $4.63 \times 10^{-24}$ | $5.31 \times 10^{-21}$ | beta-1,4-galactosyltransferase 7                   |
| ncbi_692978    | 0.442    | $6.75 \times 10^{-5}$  | 0.00224                | thymidylate synthase                               |
| ncbi_101740404 | 0.408    | $4.58 \times 10^{-5}$  | 0.00175                | methionyl-tRNA formyltransferase,<br>mitochondrial |
| ncbi_101743443 | 0.335    | $1.48 \times 10^{-5}$  | 0.000750               | mucin-2                                            |
| ncbi_692458    | 0.409    | $4.03 \times 10^{-5}$  | 0.00159                | uncharacterized protein<br>LOC692458               |
| ncbi_101744495 | 0.00577  | $6.31 \times 10^{-5}$  | 0.00215                | N-acetylneuraminate lyase                          |
| ncbi_693000    | 0.0656   | $8.87 \times 10^{-6}$  | 0.000508               | yellow-fa precursor                                |

|                |        |                        |                       |                                                                                 |
|----------------|--------|------------------------|-----------------------|---------------------------------------------------------------------------------|
| ncbi_101744555 | 0.484  | 0.000207               | 0.00526               | 3-hydroxyacyl-CoA dehydrogenase<br>type-2                                       |
| ncbi_101746170 | 0.100  | $1.86 \times 10^{-11}$ | $5.73 \times 10^{-9}$ | catalase                                                                        |
| ncbi_101741806 | 0.488  | 0.000203               | 0.00521               | protein 5NUC                                                                    |
| MSTRG.9400     | 0.0115 | 0.000395               | 0.00834               | PREDICTED: organic cation<br>transporter protein-like [Amyeloid<br>transitella] |
| ncbi_101738709 | 0.271  | $5.18 \times 10^{-7}$  | $5.48 \times 10^{-5}$ | carbonyl reductase [NADPH] 3                                                    |
| ncbi_100500758 | 0.426  | 0.000284               | 0.00651               | UDP-glucosyltransferase precursor                                               |
| ncbi_101743127 | 0.496  | 0.000695               | 0.0128                | DNA primase large subunit                                                       |

89 **Table S3.** The expression changes of genes related to immune

| ID             | Fold change<br>(G1/control) | P Value                | FDR                    | Description                                       |
|----------------|-----------------------------|------------------------|------------------------|---------------------------------------------------|
| ncbi_692420    | 0.450                       | $1.46 \times 10^{-6}$  | 0.000129               | heat shock protein 83                             |
| ncbi_100862772 | 0.0563                      | $1.36 \times 10^{-47}$ | $8.60 \times 10^{-44}$ | heat shock protein 68                             |
| ncbi_101738177 | 0.443                       | $2.94 \times 10^{-5}$  | 0.00128                | triokinase/FMN cyclase                            |
| ncbi_101736595 | 0.0115                      | $1.06 \times 10^{-5}$  | 0.000579               | uncharacterized protein LOC101736595              |
| ncbi_101745500 | 0.279                       | $8.75 \times 10^{-10}$ | $1.94 \times 10^{-7}$  | heat shock 70 kDa protein                         |
| ncbi_100147699 | 0.330                       | $2.30 \times 10^{-8}$  | $3.93 \times 10^{-6}$  | chymotrypsin inhibitor SCI-III precursor          |
| MSTRG.17018    | 0.313                       | $3.41 \times 10^{-6}$  | 0.000249               | aminopeptidase N precursor [ <i>Bombyx mori</i> ] |

|                |       |                        |                        |                                                                  |
|----------------|-------|------------------------|------------------------|------------------------------------------------------------------|
| ncbi_100642185 | 0.194 | 0.000273               | 0.00635                | soluble guanylyl cyclase alpha-1 subunit                         |
| ncbi_693028    | 0.304 | 0.00166                | 0.0228                 | cecropin-B precursor                                             |
| ncbi_733093    | 0.284 | $2.38 \times 10^{-13}$ | $9.72 \times 10^{-11}$ | heat shock protein 70 A1                                         |
| ncbi_101739681 | 0.427 | 0.00171                | 0.0231                 | cecropin-B                                                       |
| ncbi_105842081 | 0.457 | 0.00338                | 0.0370                 | adenylate cyclase type 3                                         |
| MSTRG.9759     | 0.365 | 0.00272                | 0.0315                 | serine protease inhibitor 13 precursor<br>[ <i>Bombyx mori</i> ] |
| ncbi_778518    | 0.403 | $5.04 \times 10^{-7}$  | $5.48 \times 10^{-5}$  | myosin regulatory light chain 2                                  |
| ncbi_101735832 | 0.422 | $2.59 \times 10^{-7}$  | $3.00 \times 10^{-5}$  | heat shock protein 70 A2                                         |
| ncbi_692822    | 0.433 | $6.85 \times 10^{-7}$  | $6.71 \times 10^{-5}$  | heat shock protein 70                                            |
| MSTRG.18492    | 2.52  | $1.26 \times 10^{-7}$  | $1.57 \times 10^{-5}$  | hemocytin [ <i>Bombyx mori</i> ]                                 |
| ncbi_692561    | 2.67  | $5.21 \times 10^{-5}$  | 0.00192                | notch homolog                                                    |
| ncbi_100188966 | 2.61  | 0.00119                | 0.0185                 | scavenger receptor type C precursor                              |
| ncbi_101737265 | 40.0  | 0.000213               | 0.00524                | integrin alpha-PS4-like                                          |
| ncbi_101740436 | 233   | 0.00138                | 0.0199                 | signal transducer and transcription<br>activator-like            |
| ncbi_101740789 | 2.39  | 0.00354                | 0.0382                 | phosrestin-2                                                     |
| ncbi_101745064 | 2.89  | 0.00159                | 0.0221                 | putative phosphatidate phosphatase                               |

90 **Table S4.** The expression changes of genes related to xenobiotics biodegradation

| ID | Fold change | P Value | FDR | Description |
|----|-------------|---------|-----|-------------|
|----|-------------|---------|-----|-------------|

| (G1/control)   |        |                        |                       |                                              |
|----------------|--------|------------------------|-----------------------|----------------------------------------------|
| ncbi_100141446 | 0.216  | $3.84 \times 10^{-10}$ | $9.33 \times 10^{-8}$ | glutathione S-transferase<br>epsilon 3       |
| ncbi_100329150 | 0.426  | $3.99 \times 10^{-7}$  | $4.40 \times 10^{-5}$ | carboxyl/cholinesterase 1<br>precursor       |
| ncbi_101744852 | 0.492  | $4.61 \times 10^{-5}$  | 0.00176               | cytochrome P450 4V2                          |
| ncbi_100862842 | 0.449  | $3.38 \times 10^{-6}$  | 0.000248              | UDP-glycosyltransferase<br>UGT33R2 precursor |
| ncbi_780858    | 0.427  | $2.53 \times 10^{-6}$  | 0.000205              | cytochrome P450 6AB4                         |
| ncbi_100127103 | 0.0732 | $6.56 \times 10^{-5}$  | 0.00220               | cytochrome P450 Cyp305B1<br>precursor        |
| ncbi_101738709 | 0.271  | $5.18 \times 10^{-7}$  | $5.48 \times 10^{-5}$ | carbonyl reductase [NADPH]<br>3              |
| ncbi_100500758 | 0.426  | 0.000284               | 0.00651               | UDP-glucosyltransferase<br>precursor         |
| ncbi_101737893 | 0.338  | $9.32 \times 10^{-5}$  | 0.00292               | cytochrome P450 6B2-like                     |
| ncbi_101739162 | 0.364  | $1.55 \times 10^{-5}$  | 0.000774              | probable cytochrome P450 9f2                 |
| ncbi_100862823 | 0.0120 | 0.00138                | 0.0199                | UDP-glycosyltransferase<br>UGT47A1 precursor |
| ncbi_101744935 | 0.129  | 0.00137                | 0.0199                | cytochrome P450 4V2                          |
| ncbi_100862808 | 0.102  | $2.57 \times 10^{-5}$  | 0.00112               | UDP-glycosyltransferase                      |

|                |      |                        |                        |                                                    |
|----------------|------|------------------------|------------------------|----------------------------------------------------|
|                |      |                        |                        | UGT33R1 precursor                                  |
| ncbi_101742830 | 271  | $5.94 \times 10^{-60}$ | $7.50 \times 10^{-56}$ | cytochrome P450 9e2                                |
| MSTRG.18733    | 623  | $5.87 \times 10^{-6}$  | 0.000363               | cytochrome P450, partial<br>[ <i>Bombyx mori</i> ] |
| ncbi_101736038 | 23.3 | 0.00259                | 0.0303                 | para-nitrobenzyl esterase                          |
| ncbi_100329149 | 2.26 | $1.47 \times 10^{-6}$  | 0.000129               | aliphatic nitrilase                                |
| ncbi_105842283 | 187  | 0.000116               | 0.00337                | probable cytochrome P450<br>49a1                   |

---

91 **2.4.2. GO and KEGG analysis of global gene expression changes**

92



**Table S5.** GO enrichment (TOP 20 most significantly changed ones)

| GO ID      | GO term ( level 1) | GO term (level 2)                                                 | P value | P. adjust | Numbers |      |
|------------|--------------------|-------------------------------------------------------------------|---------|-----------|---------|------|
|            |                    |                                                                   |         |           | up      | down |
| GO:0044765 | biological Process | single-organism transport                                         | 0.06    | 0.4176    | 0       | 7    |
| GO:0006820 | biological Process | anion transport                                                   | 0.06    | 0.4176    | 0       | 1    |
| GO:0006839 | biological Process | mitochondrial transport                                           | 0.06    | 0.4176    | 0       | 1    |
| GO:0007268 | biological Process | synaptic transmission                                             | 0.06    | 0.4176    | 0       | 1    |
| GO:0007271 | biological Process | synaptic transmission, cholinergic                                | 0.06    | 0.4176    | 0       | 1    |
| GO:0008033 | biological Process | tRNA processing                                                   | 0.06    | 0.4176    | 0       | 1    |
| GO:0009157 | biological Process | deoxyribonucleoside monophosphate biosynthetic process            | 0.06    | 0.4176    | 0       | 1    |
| GO:0009162 | biological Process | deoxyribonucleoside monophosphate metabolic process               | 0.06    | 0.4176    | 0       | 1    |
| GO:0009176 | biological Process | pyrimidine deoxyribonucleoside monophosphate metabolic process    | 0.06    | 0.4176    | 0       | 1    |
| GO:0009177 | biological Process | pyrimidine deoxyribonucleoside monophosphate biosynthetic process | 0.06    | 0.4176    | 0       | 1    |

|            |                    |                                                     |       |          |   |   |
|------------|--------------------|-----------------------------------------------------|-------|----------|---|---|
| GO:0010817 | biological Process | regulation of hormone levels                        | 0.06  | 0.4176   | 0 | 1 |
| GO:0015711 | biological Process | organic anion transport                             | 0.06  | 0.4176   | 0 | 1 |
| GO:0015849 | biological Process | organic acid transport                              | 0.06  | 0.4176   | 0 | 1 |
| GO:0019098 | biological Process | reproductive behavior                               | 0.06  | 0.4176   | 1 | 0 |
| GO:0032222 | biological Process | regulation of synaptic transmission, cholinergic    | 0.06  | 0.4176   | 0 | 1 |
| GO:0033057 | biological Process | multicellular organism reproductive behavior        | 0.06  | 0.4176   | 1 | 0 |
| GO:0034470 | biological Process | ncRNA processing                                    | 0.06  | 0.4176   | 0 | 1 |
| GO:0042445 | biological Process | hormone metabolic process                           | 0.06  | 0.4176   | 0 | 1 |
| GO:0042446 | biological Process | hormone biosynthetic process                        | 0.06  | 0.4176   | 0 | 1 |
| GO:0044705 | biological Process | multi-organism reproductive behavior                | 0.06  | 0.4176   | 1 | 0 |
| GO:0015291 | molecular Function | secondary active transmembrane transporter activity | 0.008 | 0.305357 | 0 | 3 |
| GO:0015929 | molecular Function | hexosaminidase activity                             | 0.029 | 0.305357 | 2 | 0 |
| GO:0022804 | molecular Function | active transmembrane transporter activity           | 0.034 | 0.305357 | 0 | 3 |

|            |                    |                                                                |       |          |   |   |
|------------|--------------------|----------------------------------------------------------------|-------|----------|---|---|
| GO:0005215 | molecular Function | transporter activity                                           | 0.049 | 0.305357 | 0 | 5 |
| GO:0001871 | molecular Function | pattern binding                                                | 0.057 | 0.305357 | 1 | 0 |
| GO:0003954 | molecular Function | NADH dehydrogenase activity                                    | 0.057 | 0.305357 | 0 | 1 |
| GO:0005310 | molecular Function | dicarboxylic acid transmembrane transporter activity           | 0.057 | 0.305357 | 0 | 1 |
| GO:0005342 | molecular Function | organic acid transmembrane transporter activity                | 0.057 | 0.305357 | 0 | 1 |
| GO:0008509 | molecular Function | anion transmembrane transporter activity                       | 0.057 | 0.305357 | 0 | 1 |
| GO:0008514 | molecular Function | organic anion transmembrane transporter activity               | 0.057 | 0.305357 | 0 | 1 |
|            |                    | oxidoreductase activity, acting on NAD(P)H, quinone or similar |       |          |   |   |
| GO:0016655 | molecular Function | compound as acceptor                                           | 0.057 | 0.305357 | 0 | 1 |
| GO:0016782 | molecular Function | transferase activity, transferring sulfur-containing groups    | 0.057 | 0.305357 | 0 | 1 |
| GO:0046943 | molecular Function | carboxylic acid transmembrane transporter activity             | 0.057 | 0.305357 | 0 | 1 |
| GO:0050136 | molecular Function | NADH dehydrogenase (quinone) activity                          | 0.057 | 0.305357 | 0 | 1 |
| GO:0008395 | molecular Function | steroid hydroxylase activity                                   | 0.112 | 0.502941 | 1 | 0 |

|            |                    |                                                      |        |          |   |    |
|------------|--------------------|------------------------------------------------------|--------|----------|---|----|
| GO:0009975 | molecular Function | cyclase activity                                     | 0.112  | 0.502941 | 0 | 1  |
| GO:0022857 | molecular Function | transmembrane transporter activity                   | 0.114  | 0.502941 | 0 | 4  |
| GO:0004553 | molecular Function | hydrolase activity, hydrolyzing O-glycosyl compounds | 0.127  | 0.529167 | 2 | 0  |
| GO:0005048 | molecular Function | signal sequence binding                              | 0.163  | 0.547826 | 0 | 1  |
| GO:0016651 | molecular Function | oxidoreductase activity, acting on NAD(P)H           | 0.163  | 0.547826 | 0 | 1  |
| <hr/>      |                    |                                                      |        |          |   |    |
| GO:0031224 | cellular Component | intrinsic component of membrane                      | 0.0054 | 0.1173   | 0 | 10 |
| GO:0044425 | cellular Component | membrane part                                        | 0.0102 | 0.1173   | 0 | 10 |
| GO:0016020 | cellular Component | membrane                                             | 0.0659 | 0.505233 | 0 | 10 |
| GO:0097458 | cellular Component | neuron part                                          | 0.1064 | 0.596083 | 0 | 1  |
| GO:0015630 | cellular Component | microtubule cytoskeleton                             | 0.1541 | 0.596083 | 2 | 0  |
| GO:0048500 | cellular Component | signal recognition particle                          | 0.1555 | 0.596083 | 0 | 1  |
| GO:0005856 | cellular Component | cytoskeleton                                         | 0.3207 | 1        | 2 | 0  |
| GO:0005737 | cellular Component | cytoplasm                                            | 0.4828 | 1        | 0 | 2  |

|            |                    |                                              |        |   |   |   |
|------------|--------------------|----------------------------------------------|--------|---|---|---|
| GO:0043228 | cellular Component | non-membrane-bounded organelle               | 0.6942 | 1 | 2 | 0 |
| GO:0043232 | cellular Component | intracellular non-membrane-bounded organelle | 0.6942 | 1 | 2 | 0 |
| GO:0044444 | cellular Component | cytoplasmic part                             | 0.7931 | 1 | 0 | 1 |
| GO:0030529 | cellular Component | intracellular ribonucleoprotein complex      | 0.8331 | 1 | 0 | 2 |
| GO:1990904 | cellular Component | ribonucleoprotein complex                    | 0.8331 | 1 | 0 | 2 |
| GO:0043229 | cellular Component | intracellular organelle                      | 0.8631 | 1 | 4 | 2 |
| GO:0043226 | cellular Component | organelle                                    | 0.8686 | 1 | 4 | 2 |
| GO:0043231 | cellular Component | intracellular membrane-bounded organelle     | 0.9049 | 1 | 2 | 2 |
| GO:0005622 | cellular Component | intracellular                                | 0.9054 | 1 | 4 | 6 |
| GO:0005623 | cellular Component | cell                                         | 0.9184 | 1 | 4 | 7 |
| GO:0044464 | cellular Component | cell part                                    | 0.9184 | 1 | 4 | 7 |
| GO:0032991 | cellular Component | macromolecular complex                       | 0.9213 | 1 | 2 | 2 |

| KEGG_A_class       | KEGG_B_class                  | Pathway                                       | Control-vs-G1(199) | All (4233) | P value  | Q value |
|--------------------|-------------------------------|-----------------------------------------------|--------------------|------------|----------|---------|
| Metabolism         | Lipid metabolism              | Cutin, suberine and wax biosynthesis          | 8                  | 34         | 0.000131 | 0.0310  |
| Organismal Systems | Aging                         | Longevity regulating pathway-worm             | 15                 | 115        | 0.000265 | 0.0310  |
| Human Diseases     | Neurodegenerative diseases    | Prion diseases                                | 7                  | 30         | 0.000369 | 0.0310  |
| Organismal Systems | Immune system                 | Antigen processing and presentation           | 6                  | 23         | 0.000516 | 0.0325  |
| Human Diseases     | Cancers                       | Transcriptional misregulation in cancers      | 13                 | 105        | 0.00112  | 0.0567  |
| Organismal Systems | Aging                         | Longevity regulating pathway-multiple species | 12                 | 103        | 0.00293  | 0.123   |
| Cellular Processes | Cellular community-eukaryotes | Gap junction                                  | 8                  | 59         | 0.00582  | 0.206   |

|                        |                                      |                                                          |    |     |         |       |
|------------------------|--------------------------------------|----------------------------------------------------------|----|-----|---------|-------|
| Cellular Processes     | Transport and catabolism             | Peroxisome                                               | 13 | 129 | 0.00702 | 0.206 |
| Human Diseases         | Infectious diseases                  | Legionellosis                                            | 6  | 38  | 0.00784 | 0.206 |
| Human Diseases         | Infectious diseases                  | Measles                                                  | 7  | 50  | 0.00816 | 0.206 |
| Metabolism             | Glycan biosynthesis and metabolism   | Glycosphingolipid biosynthesis-globo and isoglobo series | 3  | 10  | 0.00961 | 0.220 |
| Human Diseases         | Infectious diseases                  | Pathogenic Escherichia coli infection                    | 6  | 41  | 0.0114  | 0.238 |
| Environmental          |                                      |                                                          |    |     |         |       |
| Information Processing | Signal transduction                  | MAPK signaling pathway                                   | 12 | 135 | 0.0238  | 0.426 |
| Metabolism             | Lipid metabolism                     | Steroid biosynthesis                                     | 4  | 24  | 0.0240  | 0.426 |
| Metabolism             | Metabolism of cofactors and vitamins | One carbon pool by folate                                | 3  | 14  | 0.0254  | 0.426 |

|                                |                                      |                                             |   |    |        |       |
|--------------------------------|--------------------------------------|---------------------------------------------|---|----|--------|-------|
| Organismal Systems             | Digestive system                     | Fat digestion and absorption                | 6 | 51 | 0.0309 | 0.431 |
| Human Diseases                 | Infectious diseases                  | Toxoplasmosis                               | 6 | 51 | 0.0309 | 0.431 |
| Metabolism                     | Lipid metabolism                     | Glycerolipid metabolism                     | 7 | 65 | 0.0315 | 0.431 |
| Organismal Systems             | Endocrine system                     | Estrogen signaling pathway                  | 7 | 67 | 0.0364 | 0.431 |
| Metabolism                     | Metabolism of cofactors and vitamins | Pantothenate and CoA biosynthesis           | 3 | 16 | 0.0364 | 0.431 |
| Genetic Information Processing | Folding, sorting and degradation     | Sulfur relay system                         | 2 | 7  | 0.0395 | 0.431 |
| Metabolism                     | Carbohydrate metabolism              | Amino sugar and nucleotide sugar metabolism | 6 | 54 | 0.0395 | 0.431 |
| Metabolism                     | Glycan biosynthesis and metabolism   | Other glycan degradation                    | 4 | 28 | 0.0400 | 0.431 |



|                    |                                       |                                            |   |    |        |       |
|--------------------|---------------------------------------|--------------------------------------------|---|----|--------|-------|
| Metabolism         | Glycan biosynthesis<br>and metabolism | Glycosaminoglycan<br>degradation           | 3 | 17 | 0.0428 | 0.431 |
| Organismal Systems | Immune system                         | Complement and coagulation cascades        | 3 | 17 | 0.0428 | 0.431 |
| Metabolism         | Carbohydrate<br>metabolism            | Glyoxylate and dicarboxylate<br>metabolism | 5 | 42 | 0.0452 | 0.438 |

---

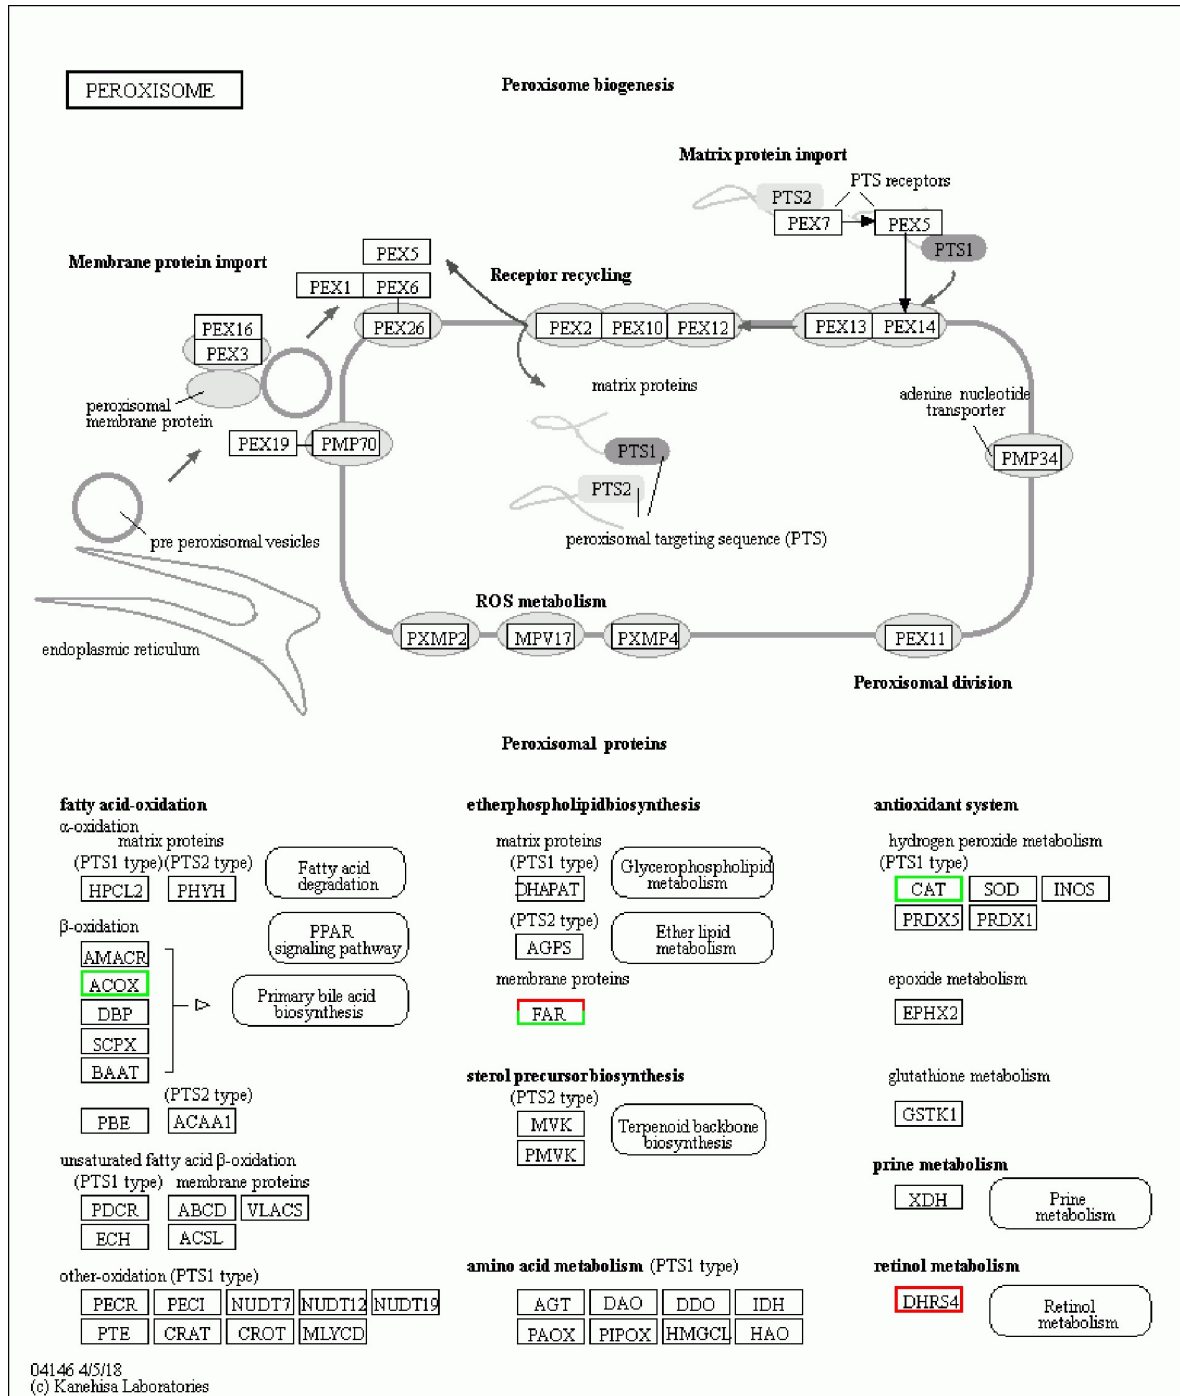

96

97 **Fig. S5** KEGG pathways of the peroxisome in MgO NPs group vs control group. Red

98 color means up-regulated, green color means down-regulated.

99 **Reference**

100 [1] E. R. Essien, V. N. Atasié, A. O. Okeafor, D. O. Nwude. Biogenic synthesis of

101 magnesium oxide nanoparticles using *Manihot esculenta* (Crantz) leaf extract. *Int.*

102 *Nano Lett.*, 2020, 10, 43–48.

103 [2] M. Vergheese, S. Kiran-Vishal. Green synthesis of magnesium oxide  
104 nanoparticles using *Trigonella foenum-graecum* leaf extract and its antibacterial  
105 activity. *J. Pharmacogn. Phytochem.* 2018, 7, 1193–1200.
